# Supplementary material
Source: Springer Nature journal article supplement (https://www.springermedizin.de/resource/supplementary/13063_2014_2328_MOESM3_ESM.pdf/9621924)

# Top journals for Hub methodology papers 2009-2012

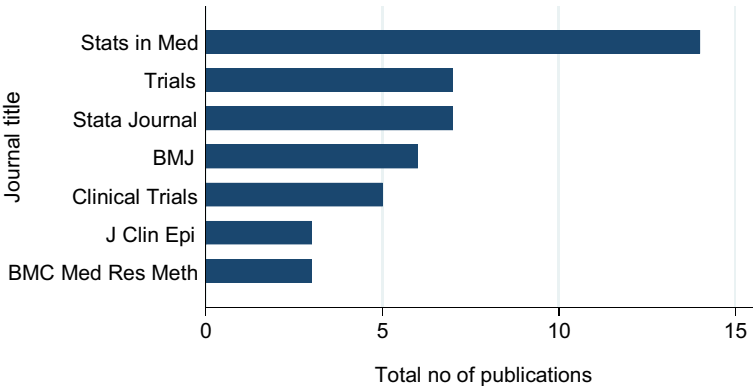

Supplement: MOESM3 [file 9621924]
